# Supplementary material
Source: Springer Nature journal article supplement (https://www.springermedizin.de/resource/supplementary/12885_2008_1243_MOESM3_ESM.pdf/9471518)

**A**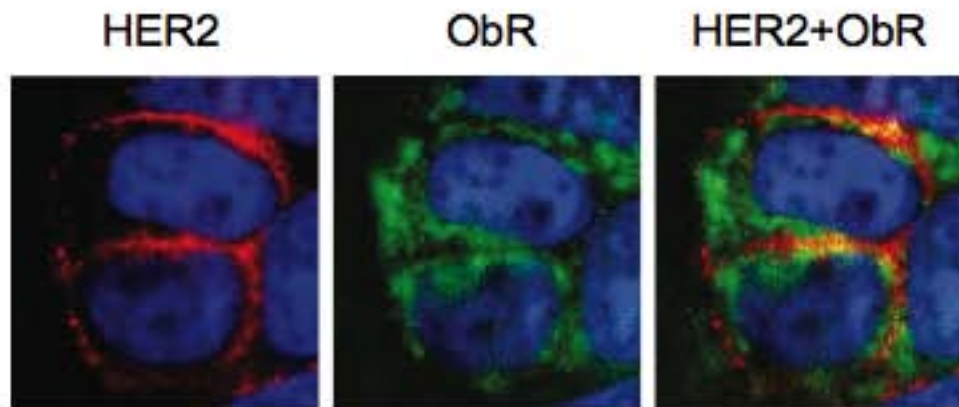

IP: ObR

IP: IgG

Tot. Prot

**B**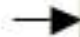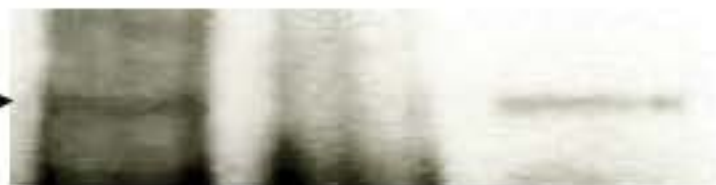

WB: HER2

Supplement: MOESM3 [file 9471518]
